# Supplementary material for: “Fighting an uphill battle”: experience with the HCV triple therapy: a qualitative thematic analysis
Source: PubMed Central journal article supplement (PMC4174651; doi:10.1186/1471-2334-14-507), 2014-09-18
Supplement: 12879_2014_3826_MOESM1_ESM.pdf [file 12879_2014_3826_MOESM1_ESM.pdf]

## Additional file 1 The six phases of thematic analysis by Braun and Clarke (2006)

Table 1: Phases of Thematic Analysis

| Phase                                     | Description of the process                                                                                                                                                                                                                     |
|-------------------------------------------|------------------------------------------------------------------------------------------------------------------------------------------------------------------------------------------------------------------------------------------------|
| 1. Familiarising yourself with your data: | Transcribing data (if necessary), reading and re-reading the data, noting down initial ideas.                                                                                                                                                  |
| 2. Generating initial codes:              | Coding interesting features of the data in a systematic fashion across the entire data set, collating data relevant to each code.                                                                                                              |
| 3. Searching for themes:                  | Collating codes into potential themes, gathering all data relevant to each potential theme.                                                                                                                                                    |
| 4. Reviewing themes:                      | Checking in the themes work in relation to the coded extracts (Level 1) and the entire data set (Level 2), generating a thematic 'map' of the analysis.                                                                                        |
| 5. Defining and naming themes:            | Ongoing analysis to refine the specifics of each theme, and the overall story the analysis tells; generating clear definitions and names for each theme.                                                                                       |
| 6. Producing the report:                  | The final opportunity for analysis. Selection of vivid, compelling extract examples, final analysis of selected extracts, relating back of the analysis to the research question and literature, producing a scholarly report of the analysis. |
