# Supplementary material for: “Fighting an uphill battle”: experience with the HCV triple therapy: a qualitative thematic analysis
Source: PubMed Central journal article supplement (PMC4174651; doi:10.1186/1471-2334-14-507), 2014-09-18
Supplement: 12879_2014_3826_MOESM2_ESM.pdf [file 12879_2014_3826_MOESM2_ESM.pdf]

## Additional file 2 15 Item Checklist by Braun and Clarke (2006)

Table 2: A 15-Point Checklist of Criteria for Good Thematic Analysis

| Process        | No. | Criteria                                                                                                                                                         |
|----------------|-----|------------------------------------------------------------------------------------------------------------------------------------------------------------------|
| Transcription  | 1   | The data have been transcribed to an appropriate level of detail, and the transcripts have been checked against the tapes for 'accuracy'.                        |
| Coding         | 2   | Each data item has been given equal attention in the coding process.                                                                                             |
|                | 3   | Themes have not been generated from a few vivid examples (an anecdotal approach), but instead the coding process has been thorough, inclusive and comprehensive. |
|                | 4   | All relevant extracts for all each theme have been collated.                                                                                                     |
|                | 5   | Themes have been checked against each other and back to the original data set.                                                                                   |
|                | 6   | Themes are internally coherent, consistent, and distinctive.                                                                                                     |
| Analysis       | 7   | Data have been analysed - interpreted, made sense of - rather than just paraphrased or described.                                                                |
|                | 8   | Analysis and data match each other - the extracts illustrate the analytic claims.                                                                                |
|                | 9   | Analysis tells a convincing and well-organised story about the data and topic.                                                                                   |
|                | 10  | A good balance between analytic narrative and illustrative extracts is provided.                                                                                 |
| Overall        | 11  | Enough time has been allocated to complete all phases of the analysis adequately, without rushing a phase or giving it a once-over-lightly.                      |
| Written report | 12  | The assumptions about, and specific approach to, thematic analysis are clearly explicated.                                                                       |
|                | 13  | There is a good fit between what you claim you do, and what you show you have done - i.e., described method and reported analysis are consistent.                |
|                | 14  | The language and concepts used in the report are consistent with the epistemological position of the analysis.                                                   |
|                | 15  | The researcher is positioned as <i>active</i> in the research process; themes do not just 'emerge'.                                                              |
